# Supplementary material for: Investigating Adherence to COVID-19 Vaccination and Serum Antibody Concentration among Hospital Workers—The Experience of an Italian Private Hospital
Source: MDPI journal article supplement (doi:10.3390/vaccines9111332), 2021-11-16
Supplement: s1 [file s1]

## SURVEY

# Risposta anticorpale e aderenza campagna vaccinale

### OBIETTIVO DELLA SURVEY

Indagine volta a determinare la risposta anticorpale a seguito della somministrazione del vaccino a operatori sanitari e non dell'Istituto Fiorentino di Cura e Assistenza (IFCA) S.p.A. Inoltre, si vuol valutare il grado di aderenza da parte degli operatori sanitari e non dell'Istituto nell'ambito della fase 1 della campagna vaccinale.

### INFORMATIVA

L'Istituto Fiorentino di Cura e Assistenza (IFCA) S.p.A. è il promotore della survey. La survey prevede la consultazione dei dati di laboratorio, pseudonimizzati, relativamente alla rilevazione dei valori di Proteina S. Il questionario, in forma anonima, è somministrato in modalità cartacea a tecnici, amministrativi e sanitari operatori della struttura. I dati relativi alla Proteina S e il questionario saranno rivolti esclusivamente a operatori sanitari e non di IFCA. Il Promotore quale Titolare del trattamento dei dati La informa ai sensi e per gli effetti degli artt. 13 e 14 del regolamento UE 2016/679 de del d.lgs. 196/2003 che , in conformità con le responsabilità previste dalle linee guida di buona pratica clinica (D. Lgs n. 211/2003) Reg. Sper Clin, con il Regolamento UE 2016/679 Regolamento generale relativo alla protezione delle persone fisiche con riguardo al trattamento dei dati personali, nonché alla libera circolazione di tali dati (di seguito RGPD) e con il D. Lgs. 30 giugno 2003 Codice in materia di protezione dei dati personali recante disposizioni per l'adeguamento dell'ordinamento nazionale al regolamento (UE) n. 2016/679, tratterà i Suoi dati personali esclusivamente nella misura in cui siano essenziali per la conduzione della survey.

I dati, trattati mediante strumenti anche elettronici, saranno diffusi solo in forma rigorosamente anonima, ad esempio attraverso pubblicazioni scientifiche, statistiche e convegni scientifici. La pseudonimizzazione dei dati personali significa che i Suoi dati personali sono trattati in modo che non possano più essere attribuiti a Lei senza l'utilizzo di informazioni aggiuntive a condizione che tali informazioni aggiuntive siano conservate separatamente e soggette a misure tecniche e organizzative. I Suoi dati pseudonimizzati saranno conservati per un periodo non superiore a quello necessario per le finalità della survey per i quali sono stati raccolti - almeno 7 (sette) anni dalla conclusione della stessa. Il Titolare del trattamento per finalità sanitarie di cura, diagnosi e prevenzione e ai fini dell'esecuzione del presente Studio è il Centro presso il quale viene effettuata la survey. Per informazioni in merito al trattamento dei dati e per i diritti connessi, si prega di contattare il Responsabile della protezione dei dati del Centro di sperimentazione.

### CONSENSO

☐ Dichiaro di aver letto l'informativa e presto il consenso alla partecipazione dell'indagine

Dichiaro di voler partecipare alla survey

☐ Sì

☐ No

## SURVEY

### Risposta anticorpale e aderenza campagna vaccinale

Gent.ma / Gent.mo

1. Lei è un operatore:

- ☐ Sanitario
- ☐ Amministrativo
- ☐ Tecnico

2. Lei ha effettuato la vaccinazione CIVID 19?

- ☐ SI                      Compilare "Sezione vaccinati" domande dalla 3 alla 7
- ☐ NO                      Compilare "Sezione NON vaccinati" domande dalla 8 alla 10

---

### Sezione vaccinati

3. Prima di effettuare la vaccinazione aveva contratto il Covid-19?

- ☐ SI
- ☐ NO

4. Se sì, quando ha contratto il Covid-19?

Mese: ..... Anno: .....

5. Ha completato la seconda somministrazione?

- ☐ SI
- ☐ NO

## QUESTIONARIO

---

6. Quale vaccino Le è stato somministrato?

- ☐ Pfizer
- ☐ AstraZeneca
- ☐ Moderna
- ☐ Altro: .....

7. A completamento della vaccinazione si è sottoposto al monitoraggio della Proteina S?

- ☐ SI
- ☐ NO

---

### Sezione non vaccinati

8. Lei ha contratto fino a oggi il Covid-19?

- ☐ SI
- ☐ NO

9. Se sì, quando ha contratto il Covid-19?

Mese: ..... Anno: .....

10. Ci può indicare la/le motivazione/motivazioni per cui non ha ancora effettuato il vaccino:

- ☐ Indisponibilità di posti
- ☐ Controindicazioni alla vaccinazione
- ☐ Diffidenza sul vaccino
- ☐ Preoccupazione effetti a lungo termine
- ☐ Contagio precedente
- ☐ Altro: .....
